# Supplementary material
Source: PubMed Central journal article supplement (PMC4268579)
Supplement: Supp_Figure1.pdf [file Supp_Figure1.pdf]

## Supplementary Data

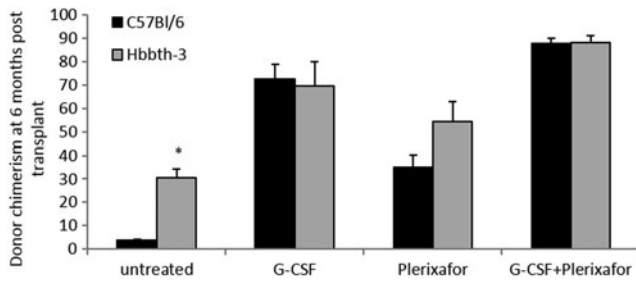

**SUPPLEMENTARY FIG. S1.** C57Bl/6 vs. Hbb<sup>th-3</sup> donor cell chimerism 6 months posttransplantation. Whole blood from mobilized normal and thalassemic 45.2<sup>+</sup> mice was infused into lethally irradiated B6.BoyJ (45.1<sup>+</sup>) mice at a 3:1 (donor:recipient) ratio, along with a steady number of competitor 45.1<sup>+</sup> cells ( $0.5 \times 10^6$ ). Each experiment was performed 3 times;  $n=5$  animals per group per experiment. Engraftment is based on the % donor's (45.2<sup>+</sup>) chimera of 45.1<sup>+</sup> recipients, 6 months posttransplantation. \* $p < 0.05$  vs. C57BL/6.
