# Supplementary material
Source: PubMed Central journal article supplement (PMC4268579)
Supplement: Supp_Figure2.pdf [file Supp_Figure2.pdf]

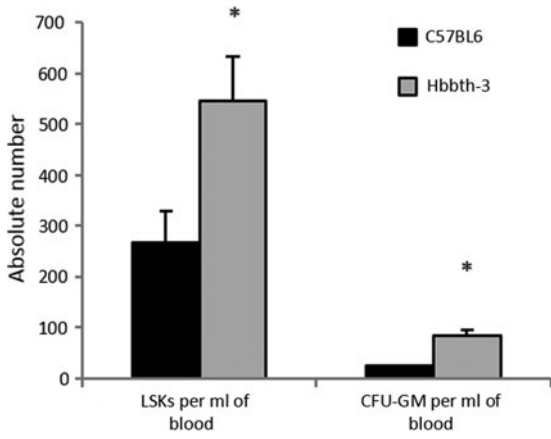

**SUPPLEMENTARY FIG. S2.** Absolute numbers of LSK cells and CFU-GM in steady-state thalassemic and normal mice. Data are expressed as mean  $\pm$  SEM from untreated normal (C57BL/6;  $n=8$ ) and thalassemic (Hbb<sup>th-3</sup>;  $n=13$ ) mice. \* $p < 0.05$  vs. C57BL/6.
