# Supplementary material
Source: PubMed Central journal article supplement (PMC4268579)
Supplement: Supp_Table1.pdf [file Supp_Table1.pdf]

SUPPLEMENTARY TABLE S1. MOBILIZATION EFFECT ON SPLEEN SIZE, SPLENIC INFARCTS, WHITE BLOOD CELL COUNT, AND RETICULOCYTES

|                   | <i>Spleen ratio</i>       | <i>Frequency of splenic infarcts</i> | <i>White blood cells</i>   |                              | <i>Reticulocytes (%)</i> |                           |
|-------------------|---------------------------|--------------------------------------|----------------------------|------------------------------|--------------------------|---------------------------|
|                   |                           |                                      | <i>Nonsplenectomized</i>   | <i>Splenectomized</i>        | <i>Nonsplenectomized</i> | <i>Splenectomized</i>     |
| Untreated         | 21.6 ± 1.00               | —                                    | 3860 ± 1189                | 12,947 ± 4426                | 24.61 ± 1.74             | 15.82 ± 1.07 <sup>d</sup> |
| G-CSF             | 30.44 ± 1.13 <sup>a</sup> | 8.82%                                | 23,943 ± 2714 <sup>a</sup> | 39,842 ± 7716 <sup>ac</sup>  | 27.11 ± 3.56             | 11.42 ± 2.00 <sup>d</sup> |
| Plerixafor        | 25.37 ± 1.18              | 3.57%                                | 15,200 ± 2834 <sup>b</sup> | 19,138 ± 5862 <sup>c</sup>   | 24.14 ± 1.84             | 13.65 ± 1.37 <sup>d</sup> |
| G-CSF+ plerixafor | 30.54 ± 1.51 <sup>a</sup> | 5.56%                                | 20,225 ± 2849 <sup>a</sup> | 86,044 ± 16,890 <sup>a</sup> | 21.83 ± 1.50             | 12.74 ± 2.09 <sup>d</sup> |

<sup>a</sup>*p* < 0.05 vs. untreated, <sup>b</sup>*p* = 0.08 vs. untreated, <sup>c</sup>*p* < 0.05 vs. G-CSF+ plerixafor, <sup>d</sup>*p* < 0.05 vs. nonsplenectomized.
