# Supplementary material
Source: PubMed Central journal article supplement (PMC4268579)

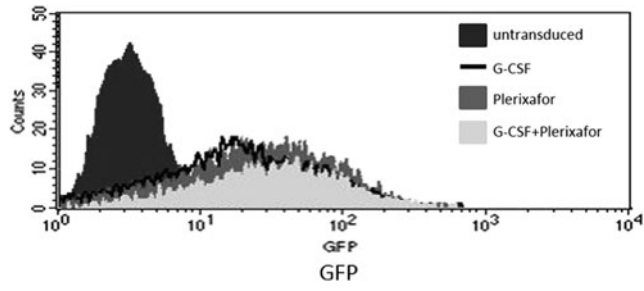

**SUPPLEMENTARY FIG. S3.** GFP expression in bulk culture after transduction.

Supplement: Supp_Figure3.pdf [file Supp_Figure3.pdf]
